# Supplementary material
Source: PubMed Central journal article supplement (PMC7125711)
Supplement: mmc1.pdf [file mmc1.pdf]

*Journal of Dairy Science* Interpretive Summary  
January 2009 (92:286–295)

**Evaluation of the effects of oral colostrum supplementation during the first fourteen days on the health and performance of preweaned calves.** *By Berge et al., page 286.* This clinical trial replicated on 3 calf ranches evaluated the effect of colostrum supplementation post gut closure on death, health, feed intake, and weight gains of preweaned calves. Ninety 1-d-old calves on each of 3 commercial calf ranches were assigned to either receive a colostrum supplement, a placebo supplement lacking immunoglobulin G, or no supplement in the milk replacer meal twice daily for 14 d. Calves receiving supplemental colostrum had 40% fewer diarrhea days than unsupplemented and placebo calves. Grain consumption and weight gain over the 4 wk were greater in colostrum-supplemented calves compared with control calves.
